# Supplementary material for: First synthesis of 1,2,3-triazolo-linked (1,6)-α-d-oligomannoses (triazolomannoses) by iterative Cu(i)-catalyzed alkyne–azide cycloaddition
Source: Royal Society of Chemistry journal article supplement (doi:10.1039/b609734k), 2006-01-01
Supplement: b609734k.pdf [file b609734k.pdf]

# First Synthesis of 1,2,3-Triazolo-Linked (1,6)- $\alpha$ -D-Oligomannoses (Triazolomannoses) by Iterative Cu(I)-Catalyzed Alkyne-Azide Cycloaddition

Pavel Cheshev, Alberto Marra,\* and Alessandro Dondoni\*

Laboratorio di Chimica Organica, Dipartimento di Chimica, Università di Ferrara, 44100 Ferrara, Italy

## Electronic Supplementary Information

All moisture-sensitive reactions were performed under a nitrogen atmosphere using oven-dried glassware. Anhydrous solvents were dried over standard drying agents<sup>19</sup> and freshly distilled prior to use. Reactions were monitored by TLC on silica gel 60 F<sub>254</sub> with detection by charring with sulfuric acid. Flash column chromatography<sup>20</sup> was performed on silica gel 60 (230-400 mesh). Optical rotations were measured at  $20 \pm 2$  °C in the stated solvent;  $[\alpha]_D$  values are given in  $10^{-1}$  deg cm<sup>2</sup> g<sup>-1</sup>. <sup>1</sup>H NMR (300 and 400 MHz) and <sup>13</sup>C NMR spectra (75 and 100 MHz) spectra were recorded for CDCl<sub>3</sub> solutions at rt unless otherwise specified; chemical shifts are in ppm ( $\delta$ ) from SiMe<sub>4</sub> (TMS) as internal standard; assignments were aided by homo- and heteronuclear two-dimensional experiments. MALDI-TOF mass spectra were acquired using 2,6-dihydroxy-benzoic acid as the matrix. The closed vessel MW experiments were performed using a Biotage Initiator apparatus; the reaction time was counted when the reaction mixture reached the preset temperature.

### Preparation of building block 1 and platform 2

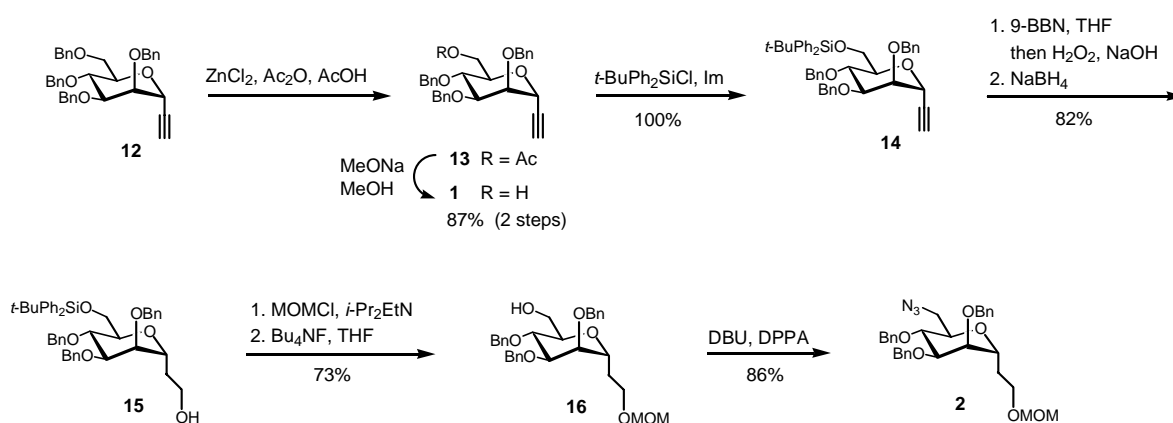

**8-O-Acetyl-3,7-anhydro-4,5,6-tri-O-benzyl-1,2-dideoxy-D-glycero-D-talo-oct-1-ynitol (13).**<sup>21</sup> To a stirred solution of known<sup>16</sup> tetra-O-benzyl derivative **12** (96 mg, 0.17 mmol) in a 2:1 mixture of acetic anhydride and acetic acid (3 cm<sup>3</sup>), ZnCl<sub>2</sub> (238 mg, 1.75 mmol) was added. The resulting mixture was stirred at rt for 4 h, then diluted with AcOEt (30 cm<sup>3</sup>), washed with H<sub>2</sub>O (2 x 20 cm<sup>3</sup>) and saturated aqueous NaHCO<sub>3</sub> (20 cm<sup>3</sup>), dried (Na<sub>2</sub>SO<sub>4</sub>), and concentrated. The residue was eluted from a column of silica gel with 5:1 cyclohexane-AcOEt to give **13** (83 mg, 95%) as an

amorphous solid;  $[\alpha]_D = +20.7$  ( $c$  1.0,  $\text{CHCl}_3$ ). The  $^1\text{H}$  NMR data of **13** were identical to those previously reported<sup>21</sup>. Anal. Calcd. for  $\text{C}_{31}\text{H}_{32}\text{O}_6$ : C, 74.38; H, 6.44;. Found: C, 74.10; H, 6.20.

**3,7-Anhydro-4,5,6-tri-*O*-benzyl-1,2-dideoxy-D-glycero-D-talo-oct-1-ynitol (1)**. To a stirred solution of known<sup>16</sup> tetra-*O*-benzyl derivative **12** (577 mg, 1.05 mmol) in a 2:1 mixture of acetic anhydride and acetic acid (15  $\text{cm}^3$ ),  $\text{ZnCl}_2$  (1.43 g, 10.5 mmol) was added. The resulting mixture was stirred at rt for 7 h, then diluted with AcOEt (50  $\text{cm}^3$ ), washed with  $\text{H}_2\text{O}$  (2 x 30  $\text{cm}^3$ ) and saturated aqueous  $\text{NaHCO}_3$  (30  $\text{cm}^3$ ), dried ( $\text{Na}_2\text{SO}_4$ ), concentrated, and dried under high vacuum to give crude acetate **13**. To a solution of **13** in MeOH (20  $\text{cm}^3$ ) was added a 0.2 M solution of NaOMe in MeOH (3  $\text{cm}^3$ , freshly prepared from Na and MeOH). The solution was kept at rt for 1 h, then neutralized with acetic acid, and concentrated. A solution of the residue in AcOEt (50  $\text{cm}^3$ ) was washed with  $\text{H}_2\text{O}$  (30  $\text{cm}^3$ ) and saturated aqueous  $\text{NaHCO}_3$  (30  $\text{cm}^3$ ), dried ( $\text{Na}_2\text{SO}_4$ ), and concentrated. The residue was eluted from a column of silica gel with 3:1 cyclohexane-AcOEt to afford alcohol **1** (420 mg, 87%) as an amorphous solid;  $[\alpha]_D = +27.7$  ( $c$  1.0,  $\text{CHCl}_3$ ).  $^1\text{H}$  NMR:  $\delta$  7.45-7.23 (15 H, m, 3 Ph), 5.02-4.62 (7 H, m,  $\text{PhCH}_2$  and 3-H), 4.11 (1 H, dd,  $J_{4,5} = 2.5$ ,  $J_{5,6} = 9.0$  Hz, 5-H), 4.01 (1 H, t,  $J_{6,7} = 10.5$  Hz, 6-H), 3.96-3.78 (4 H, m, 4-H, 7-H and 8-H), 2.58 (2 H, d,  $J_{1,3} = 2.5$  Hz, 1-H), 2.12 (1 H, br t, OH).  $^{13}\text{C}$  NMR:  $\delta$  138.1 (C), 137.8 (C), 128.4 (CH), 128.1 (CH), 127.8 (CH), 127.7 (CH), 80.1 ( $\text{CH}_2$ ), 78.4 (C), 77.5 (CH), 76.4 (CH), 75.3 (CH), 75.0 ( $\text{CH}_2$ ), 74.6 ( $\text{CH}_2$ ), 72.2 (CH), 66.3 ( $\text{CH}_2$ ), 62.3 (CH). MALDI-TOF MS: 481.3 ( $\text{M}^+ + \text{Na}$ ). Anal. Calcd. for  $\text{C}_{29}\text{H}_{30}\text{O}_5$ : C, 75.96; H, 6.59. Found: C, 75.76; H, 6.30.

**3,7-Anhydro-4,5,6-tri-*O*-benzyl-8-*O*-tert-butyldimethylsilyl-1,2-dideoxy-D-glycero-D-talo-oct-1-ynitol (14)**. To a stirred solution of alcohol **1** (310 mg, 0.68 mmol) in anhydrous DMF (5  $\text{cm}^3$ ) was added imidazole (460 mg, 6.80 mmol), followed by *tert*-butyldimethylsilyl chloride (510 mg, 3.38 mmol). The resulting solution was kept at rt for 3 h, then diluted with AcOEt (50  $\text{cm}^3$ ), washed with  $\text{H}_2\text{O}$  (2 x 30  $\text{cm}^3$ ) and brine (20  $\text{cm}^3$ ), dried ( $\text{Na}_2\text{SO}_4$ ), and concentrated. The residue was eluted from a column of silica gel with 9:1 cyclohexane-AcOEt to afford **14** (387 mg, 100%) as a syrup;  $[\alpha]_D = +13.7$  ( $c$  1.0,  $\text{CHCl}_3$ ).  $^1\text{H}$  NMR:  $\delta$  7.45-7.23 (15 H, m, 3 Ph), 5.02-4.62 (6 H, m, 3  $\text{PhCH}_2$ ), 4.80 (1 H, t,  $J_{3,4} = 2.5$  Hz, 3-H), 4.07 (2 H, m, 8-H), 4.01 (1 H, dd,  $J_{4,5} = 4.0$  Hz,  $J_{5,6} = 11.5$  Hz, 5-H), 3.95 (1 H, dd,  $J_{6,7} = 1.7$  Hz, 6-H), 3.84 (1 H, dd, 4-H), 3.82 (1 H, ddd,  $J = 1.7, 5.0, 5.0$  Hz, 7-H), 2.53 (1 H, d,  $J_{1,3} = 2.5$  Hz, 1-H), 0.93 (9 H, s,  $\text{C}(\text{CH}_3)_3$ ), 0.13 and 0.16 (6 H, 2 s, 2  $\text{CH}_3$ ). MALDI-TOF MS: 595.6 ( $\text{M}^+ + \text{Na}$ ), 609.6 ( $\text{M}^+ + \text{K}$ ). Anal. Calcd. for  $\text{C}_{35}\text{H}_{44}\text{O}_5\text{Si}$ : C, 73.39; H, 7.74. Found: C, 73.16; H, 7.50.

**3,7-Anhydro-4,5,6-tri-*O*-benzyl-8-*O*-tert-butyldimethylsilyl-2-deoxy-D-glycero-D-talo-octitol (15)**. To a stirred solution of **14** (118 mg, 0.21 mmol) in anhydrous THF (2  $\text{cm}^3$ ) was added dropwise 9-BBN (1.0 mmol, 2  $\text{cm}^3$  of a 0.5 M solution in THF). Stirring was continued at rt for 18 h, then to the reaction mixture was added an alkaline solution of  $\text{H}_2\text{O}_2$  (freshly prepared from 1  $\text{cm}^3$  of 6 M aqueous solution of NaOH and 400  $\text{mm}^3$  of a ca. 35% solution of  $\text{H}_2\text{O}_2$  in water). The

reaction mixture was stirred at rt for 2 h, then cooled to 0 °C and treated with NaBH<sub>4</sub> (100 mg, 2.6 mmol). The mixture was stirred for an additional 30 min at rt, then diluted with acetic acid (0.5 cm<sup>3</sup>) and AcOEt (30 cm<sup>3</sup>), washed with H<sub>2</sub>O (30 cm<sup>3</sup>) and saturated NaHCO<sub>3</sub> (30 cm<sup>3</sup>), dried (Na<sub>2</sub>SO<sub>4</sub>), and concentrated. The residue was eluted from a column of silica gel with 3:1 cyclohexane-AcOEt to give **15** (100 mg, 82%) as a syrup; [ $\alpha$ ]<sub>D</sub> = +19.2 (*c* 1.4, CHCl<sub>3</sub>). <sup>1</sup>H NMR selected data:  $\delta$  7.48-7.25 (15 H, m, 3 Ph), 4.68-4.50 (6 H, m, 3 PhCH<sub>2</sub>), 4.18 (1 H, ddd, *J* = 3.5, 6.0, 10.0 Hz, 3-H), 2.82 (1 H, br t, OH), 1.98-1.70 (2 H, m, 2-H), 0.91 (9 H, s, C(CH<sub>3</sub>)<sub>3</sub>), 0.12 and 0.14 (6 H, 2 s, 2 CH<sub>3</sub>). MALDI-TOF MS: 615.9 (M<sup>+</sup> + Na). Anal. Calcd. for C<sub>35</sub>H<sub>48</sub>O<sub>6</sub>Si: C, 70.91; H, 8.16. Found: C, 70.77; H, 8.10.

**3,7-Anhydro-4,5,6-tri-*O*-benzyl-2-deoxy-1-*O*-methoxymethyl-D-glycero-D-talo-octitol (16).** To a stirred, cooled (0 °C) solution of alcohol **15** (90 mg, 0.15 mmol) in anhydrous CH<sub>2</sub>Cl<sub>2</sub> (2 cm<sup>3</sup>) was added *N,N*-diisopropylethylamine (150 mm<sup>3</sup>, 0.86 mmol) and chloromethyl methyl ether (35 mm<sup>3</sup>, 0.46 mmol). The mixture was stirred at rt for 3 h, then diluted with MeOH (0.5 cm<sup>3</sup>) and concentrated. To a solution of the residue in THF (3 cm<sup>3</sup>) was added tetrabutylammonium fluoride trihydrate (80 mg, 0.3 mmol). The reaction mixture was stirred at rt for 15 h, then concentrated. The residue was eluted from a column of silica gel with 1:1 cyclohexane-AcOEt to afford syrupy **16** (58 mg, 73%); [ $\alpha$ ]<sub>D</sub> = +9.8 (*c* 1, CHCl<sub>3</sub>). <sup>1</sup>H NMR:  $\delta$  7.45-7.23 (15 H, m, 3 Ph), 4.90-4.55 (8 H, m, PhCH<sub>2</sub> and OCH<sub>2</sub>OMe), 4.21 (1 H, ddd, *J*<sub>3,4</sub> = 4.0 Hz, *J*<sub>2,3</sub> = 9.5 Hz, 3-H), 3.98-3.56 (8 H, m, 1,4,5,6,7,8-H), 3.36 (3 H, s, CH<sub>3</sub>), 2.45 (1 H, br s, OH), 1.96-1.75 (2 H, m, 2-H). <sup>13</sup>C NMR:  $\delta$  138.4 (C), 128.7 (CH), 128.2 (CH), 128.1 (CH), 96.7 (CH<sub>2</sub>), 78.0 (CH), 76.5 (CH), 75.4 (CH), 74.5 (CH) and (CH<sub>2</sub>), 72.6 (CH<sub>2</sub>), 72.1 (CH<sub>2</sub>), 70.6 (CH), 64.3 (CH<sub>2</sub>), 62.1 (CH<sub>2</sub>), 55.6 (CH<sub>3</sub>), 29.8 (CH<sub>2</sub>). MALDI-TOF MS: 545.6 (M<sup>+</sup> + Na). Anal. Calcd. for C<sub>31</sub>H<sub>38</sub>O<sub>7</sub>: C, 71.24; H, 7.33. Found: C, 70.96; H, 7.40.

**3,7-Anhydro-8-azido-4,5,6-tri-*O*-benzyl-1,2,8-trideoxy-1-*O*-methoxymethyl-D-glycero-D-talo-octitol (2).** A mixture of alcohol **16** (218 mg, 0.42 mmol), diphenyl phosphoryl azide (270 mm<sup>3</sup>, 1.25 mmol), 1,8-diazabicyclo[5.4.0]undec-7-ene (125 mm<sup>3</sup>, 0.84 mmol), and anhydrous DMF (2.5 cm<sup>3</sup>) was stirred at 120 °C for 20 h, then cooled to room temperature, diluted with AcOEt (50 cm<sup>3</sup>), washed with saturated aqueous Na<sub>2</sub>CO<sub>3</sub> (30 cm<sup>3</sup>), dried (Na<sub>2</sub>SO<sub>4</sub>), and concentrated. The residue was eluted from a column of silica gel with 3:1 cyclohexane-AcOEt to afford **2** (197 mg, 86%) as a syrup; [ $\alpha$ ]<sub>D</sub> = + 6.0 (*c* 1, CHCl<sub>3</sub>). <sup>1</sup>H NMR:  $\delta$  7.45-7.21 (15 H, m, 3 Ph), 4.90-4.55 (8 H, m, 3 PhCH<sub>2</sub> and OCH<sub>2</sub>OMe), 4.21 (1 H, ddd, *J*<sub>3,4</sub> = 4.0 Hz, *J*<sub>2,3</sub> = 8.5 Hz, 3-H), 3.77 (1 H, m, 5-H), 3.70 (1 H, ddd, *J* = 3.1, 7.0 Hz, 7-H), 3.64 (1 H, dd, *J*<sub>4,5</sub> = 2.2 Hz, 4-H), 3.59 (1 H, m, 1-H), 3.55 (1 H, t, *J*<sub>6,7</sub> = 7.0 Hz, 6-H), 3.51 and 3.38 (2 H, 2 m, 8-H), 3.36 (3 H, s, CH<sub>3</sub>), 1.97-1.70 (2 H, m, 2-H). <sup>13</sup>C NMR:  $\delta$  138.0 (C), 128.5 (CH), 128.4 (CH), 128.0 (CH), 127.7 (CH), 96.5 (CH<sub>2</sub>), 77.6 (CH), 75.8 (CH), 75.6 (CH), 74.3 (CH<sub>2</sub>), 73.3 (CH), 72.1 (CH<sub>2</sub>), 71.7 (CH<sub>2</sub>), 70.6 (CH), 64.0 (CH<sub>2</sub>), 55.2 (CH<sub>3</sub>), 51.3 (CH<sub>2</sub>), 29.6 (CH<sub>2</sub>). MALDI-TOF MS: 585.5 (M<sup>+</sup> + K). Anal. Calcd. for C<sub>31</sub>H<sub>37</sub>N<sub>3</sub>O<sub>6</sub>: C, 67.99; H, 6.81; N, 7.67. Found: C, 68.30; H, 6.93; N, 7.52.

**8-[1-(2,3,4-tri-*O*-benzyl- $\alpha$ -D-mannopyranosyl)-1*H*-1,2,3-triazol-4-yl]-3,7-anhydro-4,5,6-tri-*O*-benzyl-1,2,8-trideoxy-1-*O*-methoxymethyl-D-glycero-D-talo-octitol (**3**).**

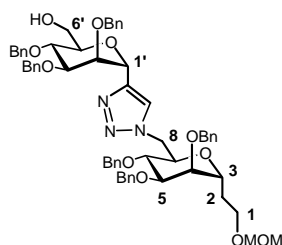

A mixture of sugar acetylene **1** (120 mg, 0.26 mmol), sugar azide **2** (129 mg, 0.24 mmol), *N,N*-diisopropylethylamine (170 mm<sup>3</sup>, 1.00 mmol), CuI (10 mg, 0.05 mmol), and toluene (3 cm<sup>3</sup>) was stirred in the dark at rt for 18 h, then diluted with AcOEt (50 cm<sup>3</sup>), washed with saturated aqueous NaHCO<sub>3</sub> (30 cm<sup>3</sup>), dried (Na<sub>2</sub>SO<sub>4</sub>), and concentrated. The residue was eluted from a column of silica gel with cyclohexane-AcOEt (from 2:1 to 1:1) to give first unreacted acetylene **1** (15 mg, 12%). Eluted second was **3** (190 mg, 80%) as an amorphous solid;  $[\alpha]_D = +22.4$  (*c* 1.0, CHCl<sub>3</sub>). <sup>1</sup>H NMR selected data:  $\delta$  7.68 (1 H, s, triazole 4-H), 5.24 (1 H, d,  $J_{1',2'} = 1.8$  Hz, 1'-H), 4.20 (1 H, ddd,  $J = 4.0, 4.0, 6.5$  Hz, 3-H), 3.36 (3 H, s, CH<sub>3</sub>), 2.39 (1 H, br s, OH), 1.97-1.70 (2 H, m, 2-H). <sup>13</sup>C NMR selected data:  $\delta$  144.6 (C, triazole 4-C), 123.9 (CH, triazole 5-C), 96.4 (OCH<sub>2</sub>O), 71.1 (CH, 1'-C), 70.3 (CH, 3-C), 55.3 (CH<sub>3</sub>), 29.7 (CH<sub>2</sub>, 2-C). MALDI-TOF MS: 1027.8 (M<sup>+</sup> + Na). Anal. Calcd. for C<sub>60</sub>H<sub>67</sub>N<sub>3</sub>O<sub>11</sub>: C, 71.62; H, 6.71; N, 4.18. Found: C, 71.83; H, 6.66; N, 3.89.

**8-[1-(6-azido-2,3,4-tri-*O*-benzyl-6-deoxy- $\alpha$ -D-mannopyranosyl)-1*H*-1,2,3-triazol-4-yl]-3,7-anhydro-4,5,6-tri-*O*-benzyl-1,2,8-trideoxy-1-*O*-methoxymethyl-D-glycero-D-talo-octitol (**4**).**

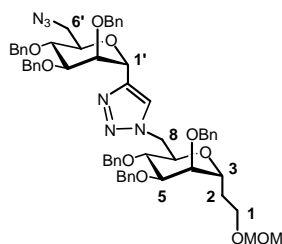

The replacement of the hydroxy group of **3** (180 mg, 0.18 mmol) with an azido group was performed as described for the synthesis of **2** to give, after column chromatography on silica gel (2:1 cyclohexane-AcOEt) azide **4** as an amorphous solid (150 mg, 81%);  $[\alpha]_D = +13.4$  (*c* 1.0, CHCl<sub>3</sub>). <sup>1</sup>H NMR selected data:  $\delta$  7.73 (1 H, s, triazole 4-H), 5.23 (1 H, d,  $J_{1',2'} = 1.8$  Hz, 1'-H), 4.22 (1 H, ddd,  $J = 4.0, 4.0, 6.0$  Hz, 3-H), 3.30 (3 H, s, CH<sub>3</sub>), 1.97-1.70 (2 H, m, 2-H). <sup>13</sup>C NMR selected data:  $\delta$  144.5 (C, triazole 4-C), 124.1 (CH, triazole 5-C), 96.4 (OCH<sub>2</sub>O), 70.9 (CH, 1'-C), 70.8 (CH, 3-C), 55.3 (CH<sub>3</sub>), 29.6 (CH<sub>2</sub>, 2-C). MALDI-TOF MS: 1070.2 (M<sup>+</sup> + H + K). Anal. Calcd. for C<sub>60</sub>H<sub>66</sub>N<sub>6</sub>O<sub>10</sub>: C, 69.88; H, 6.45; N, 8.15. Found: C, 70.11; H, 6.77; N, 8.43.

**Trimannoside (5).**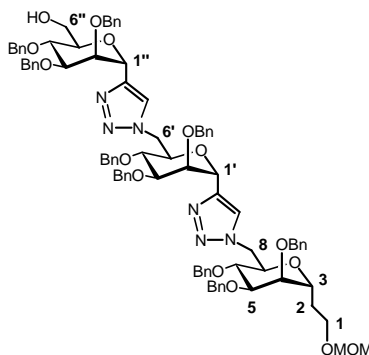

The coupling of azide **4** (120 mg, 0.12 mmol) with sugar acetylene **1** (60 mg, 0.13 mmol) was performed as described for the synthesis of **3** to give, after column chromatography on silica gel (from 3:2 to 1:1 cyclohexane-AcOEt), **5** as an amorphous solid (150 mg, 87%);  $[\alpha]_D = +18.5$  (*c* 1, CHCl<sub>3</sub>). <sup>1</sup>H NMR selected data:  $\delta$  7.83 and 7.52 (2 H, 2 s, triazole 4-H), 5.29 and 5.22 (2 H, 2 d, *J* = 1.7 Hz, 1'-H, 1''-H), 4.24 (1 H, ddd, *J* = 4.0, 4.0, 6.5 Hz, 3-H), 3.28 (3 H, s, CH<sub>3</sub>), 2.33 (1 H, br t, OH), 1.83-1.70 (2 H, m, 2-H). <sup>13</sup>C NMR selected data:  $\delta$  144.6 and 143.9 (C, triazole 4-C), 124.2 and 124.0 (CH, triazole 5-C), 96.4 (OCH<sub>2</sub>O), 71.4 and 70.6 (CH, 1'-C, 1''-C and 3-C), 55.2 (CH<sub>3</sub>), 29.7 (CH<sub>2</sub>, 2-C). MALDI-TOF MS: 1513.1 (M<sup>+</sup> + H + Na). Anal. Calcd. for C<sub>89</sub>H<sub>96</sub>N<sub>6</sub>O<sub>15</sub>: C, 71.75; H, 6.50; N, 5.64. Found: C, 71.90; H, 6.27; N, 5.37.

**Trimannoside azide (6).**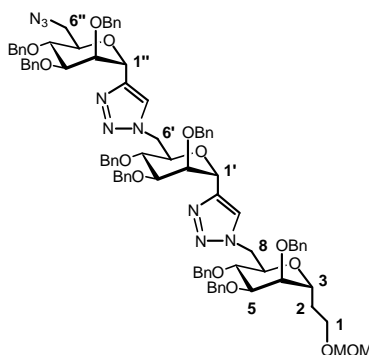

The replacement of the hydroxy group of **5** (110 mg, 0.074 mmol) with an azido group was performed as described for the synthesis of **2** to give, after column chromatography on silica gel (3:1 cyclohexane-AcOEt), azide **6** as an amorphous solid (95 mg, 85%);  $[\alpha]_D = +12.7$  (*c* 1.0, CHCl<sub>3</sub>). <sup>1</sup>H NMR selected data:  $\delta$  7.91 and 7.56 (2 H, 2 s, triazole 4-H), 5.28 and 5.24 (2 H, 2 d, *J* = 1.7 Hz, 1'-H, 1''-H), 4.23 (1 H, ddd, *J* = 6.0, 6.0, 7.5 Hz, 3-H), 3.29 (3 H, s, CH<sub>3</sub>), 1.80-1.70 (2 H, m, 2-H). <sup>13</sup>C NMR selected data:  $\delta$  144.5 and 143.9 (C, triazole 4-C), 124.5 and 124.2 (CH, triazole 5-C), 96.4 (OCH<sub>2</sub>O), 71.0, 70.7 and 70.5 (CH, 1'-C, 1''-C and 3-C), 55.2 (CH<sub>3</sub>), 29.7 (CH<sub>2</sub>, 2-C). MALDI-TOF MS: 1537.9 (M<sup>+</sup> + H + Na). Anal. Calcd. for C<sub>89</sub>H<sub>95</sub>N<sub>9</sub>O<sub>14</sub>: C, 70.57; H, 6.32; N, 8.32. Found: C, 70.73; H, 6.11; N, 8.54.

**Tetramannoside (7).**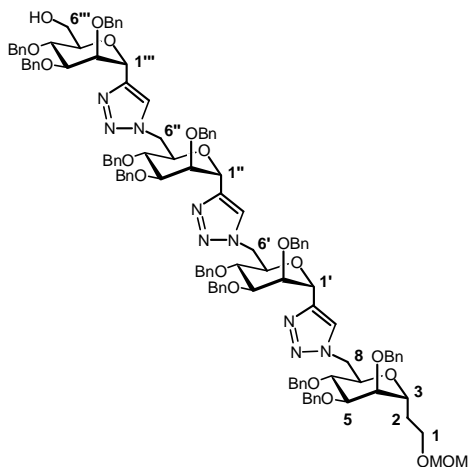

The coupling of azide **6** (80 mg, 0.053 mmol) with sugar acetylene **1** (27 mg, 0.058 mmol) was performed as described for the synthesis of **3** to give, after column chromatography on silica gel (2:1 cyclohexane-AcOEt), **7** as an amorphous solid (94 mg, 90%);  $[\alpha]_D = +17.8$  (*c* 1.0, CHCl<sub>3</sub>). <sup>1</sup>H NMR selected data:  $\delta$  7.82, 7.71 and 7.46 (3 H, 3 s, triazole 4-H), 5.31, 5.28 and 5.24 (3 H, 3 d, *J* = 1.7 Hz, 1'-H, 1''-H, 1'''-H), 4.23 (1 H, ddd, *J* = 4.5, 4.5, 7.5 Hz, 3-H), 3.25 (3 H, s, CH<sub>3</sub>), 2.33 (1 H, br t, OH), 1.80-1.67 (2 H, m, 2-H). MALDI-TOF MS: 1996.5 (*M*<sup>+</sup> + Na). Anal. Calcd. for C<sub>118</sub>H<sub>125</sub>N<sub>9</sub>O<sub>19</sub>: C, 71.82; H, 6.38; N, 6.39. Found: C, 71.54; H, 6.61; N, 6.73.

**Tetramannoside azide (8).**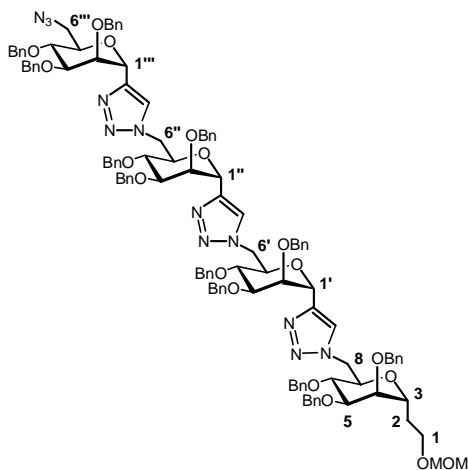

The replacement of the hydroxy group of **7** (50 mg, 0.025 mmol) with an azido group was performed as described for the synthesis of **2** to give, after column chromatography on silica gel (3:1 cyclohexane-AcOEt), azide **8** as an amorphous solid (40 mg, 79%);  $[\alpha]_D = +12.3$  (*c* 1.0, CHCl<sub>3</sub>). <sup>1</sup>H NMR selected data:  $\delta$  7.90, 7.73 and 7.45 (3 H, 3 s, triazole 4-H), 5.31 and 5.27 (3 H, 3 d, *J* = 1.8 Hz, 1'-H, 1''-H, 1'''-H), 4.23 (1 H, ddd, *J* = 4.5, 4.5, 7.5 Hz, 3-H), 3.25 (3 H, s, CH<sub>3</sub>), 1.80-1.67 (2 H, m, 2-H). <sup>13</sup>C NMR selected data:  $\delta$  144.5 and 143.9 (C, triazole 4-C), 124.5 and 123.9 (CH, triazole 5-C), 96.4 (OCH<sub>2</sub>O), 55.2 (CH<sub>3</sub>), 29.6 (CH<sub>2</sub>, 2-C). MALDI-TOF MS: 2021.4 (*M*<sup>+</sup> + Na). Anal. Calcd. for C<sub>118</sub>H<sub>124</sub>N<sub>12</sub>O<sub>18</sub>: C, 70.92; H, 6.25; N, 8.41. Found: C, 70.67; H, 6.19; N, 8.33.

**Pentamannoside (9).**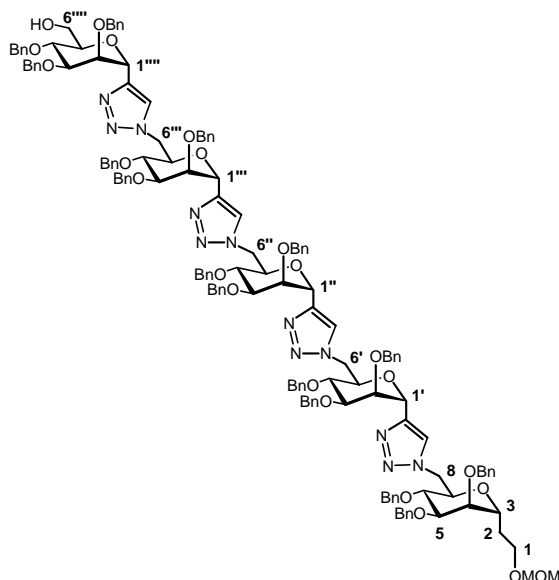

The coupling of azide **8** (28 mg, 0.014 mmol) with sugar acetylene **1** (7 mg, 0.015 mmol) was performed as described for the synthesis of **3** to give, after column chromatography on silica gel (from 2:1 to 1:1 cyclohexane-AcOEt), **9** as an amorphous solid (29 mg, 84%);  $[\alpha]_D = +17.0$  (*c* 1.0, CHCl<sub>3</sub>). <sup>1</sup>H NMR selected data:  $\delta$  7.84, 7.63, 7.60 and 7.44 (4 H, 4 s, triazole 4-H), 5.41, 5.39, 5.30 and 5.27 (4 H, 4 d, *J* = 1.7 Hz, 1'-H, 1''-H, 1'''-H, 1''''-H), 4.24 (1 H, ddd, *J* = 4.5, 4.5, 7.5 Hz, 3-H), 3.22 (3 H, s, CH<sub>3</sub>), 2.38 (1 H, br s, OH), 1.80-1.67 (2 H, m, 2-H). <sup>13</sup>C NMR selected data:  $\delta$  144.7 and 143.7 (C, triazole 4-C), 124.5, 124.3 and 123.9 (CH, triazole 5-C), 96.3 (OCH<sub>2</sub>O), 71.5, 71.4, 71.2, 71.0 and 70.6 (CH, 1'-C, 1''-C, 1'''-C, 1''''-C and 3-C), 55.1 (CH<sub>3</sub>), 29.7 (CH<sub>2</sub>, 2-C). MALDI-TOF MS: 1027.8 (M<sup>+</sup> + Na). Anal. Calcd. for C<sub>147</sub>H<sub>154</sub>N<sub>12</sub>O<sub>23</sub>: C, 71.86; H, 6.32; N, 6.84;. Found: C, 71.61; H, 6.27; N, 7.07.

**Peracetylated pentamannoside (10).**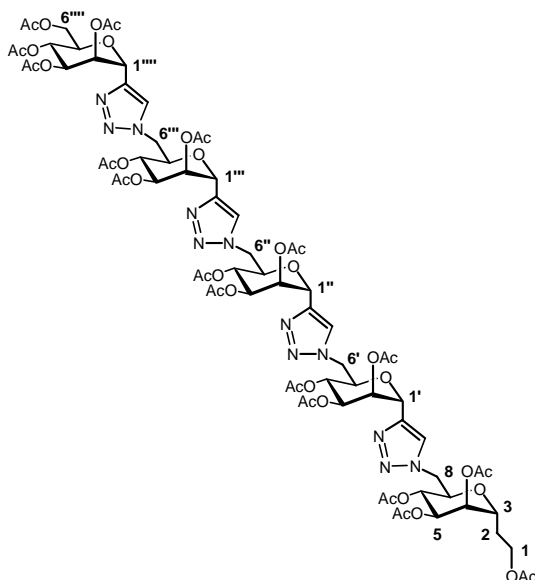

To a solution of **9** (15 mg, 6  $\mu\text{mol}$ ) in anhydrous  $\text{CH}_2\text{Cl}_2$  (2  $\text{cm}^3$ ) was added trifluoroacetic acid (100  $\text{mm}^3$ ). The solution was kept at rt for 3 h, then concentrated and dried under high vacuum. The  $^1\text{H}$  NMR analysis of the crude product proved the absence of the methoxymethyl protecting group. To a stirred, cooled ( $-60\text{ }^\circ\text{C}$ ) solution of the residue in anhydrous  $\text{CH}_2\text{Cl}_2$  (2  $\text{cm}^3$ ) was added a 1 M solution of  $\text{BCl}_3$  in  $\text{CH}_2\text{Cl}_2$  (480  $\text{mm}^3$ , 0.48 mmol). The solution was stirred at  $-60\text{ }^\circ\text{C}$  for 1 h and, after an additional 1 h stirring at  $0\text{ }^\circ\text{C}$ , diluted with MeOH (0.5  $\text{cm}^3$ ), stirred at  $0\text{ }^\circ\text{C}$  for 15 min, diluted with triethylamine (0.5  $\text{cm}^3$ ), concentrated, and dried under high vacuum to give a white solid. A suspension of the residue in pyridine (2  $\text{cm}^3$ ) and acetic anhydride (0.5  $\text{cm}^3$ ) was stirred at rt for 18 h, then diluted with MeOH (1  $\text{cm}^3$ ) and concentrated. The residue was eluted from a column of silica gel (3:1  $\text{CH}_2\text{Cl}_2$ -AcOEt, then AcOEt) to give **10** (9 mg, 83%);  $[\alpha]_{\text{D}} = +3.3$  ( $c$  0.8,  $\text{CHCl}_3$ ).  $^1\text{H}$  NMR selected data:  $\delta$  8.05, 7.81, 7.79, and 7.69 (4 H, 4 s, triazole 4-H), 5.86, 5.85, 5.78 and 5.77 (4 H, 4 d,  $J = 1.9$  Hz, 1'-H, 1''-H, 1'''-H, 1''''-H), 4.24 (1 H, ddd,  $J = 4.5, 7.5$  Hz, 3-H), 1.64-1.58 (2 H, m, 2-H).  $^{13}\text{C}$  NMR selected data:  $\delta$  142.6, 142.1 and 141.7 (C, triazole 4-C), 124.4 and 124.3 (CH, triazole 5-C), 68.4, 68.0, 67.7, 66.6 and 64.9 (CH, 1'-C, 1''-C, 1'''-C, 1''''-C and 3-C), 29.7 ( $\text{CH}_2$ , 2-C). MALDI-TOF MS: 1798.9 ( $\text{M}^+ + \text{H} + \text{Na}$ ). Anal. Calcd. for  $\text{C}_{74}\text{H}_{94}\text{N}_{12}\text{O}_{39}$ : C, 50.06; H, 5.34; N, 9.47. Found: C, 49.93; H, 5.41; N, 9.66.

### Free hydroxy pentamannoside (**11**).

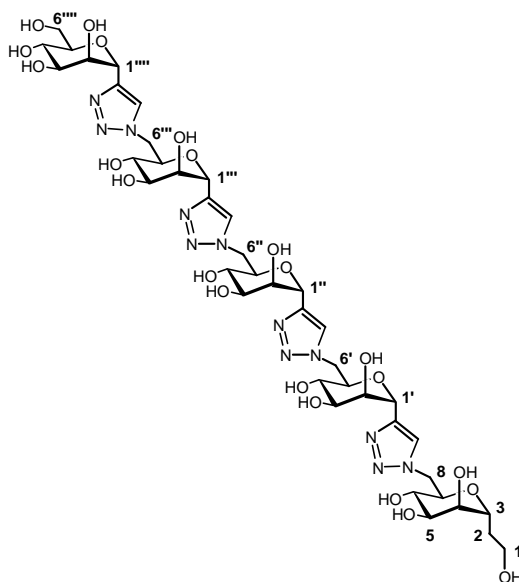

To a solution of **10** (9 mg, 0.005 mmol) in MeOH (1  $\text{cm}^3$ ) was added a ca. 0.2 M solution of NaOMe in MeOH (0.2  $\text{cm}^3$ , prepared from Na and MeOH immediately before the use) and, after 1 h,  $\text{H}_2\text{O}$  (0.3  $\text{cm}^3$ ). The solution was kept at rt for an additional 1 h, then neutralized with Dowex 50X2-400 resin ( $\text{H}^+$  form, activated and washed with  $\text{H}_2\text{O}$  and MeOH immediately before the use). The resin was washed with  $\text{H}_2\text{O}$  and MeOH, the solution was concentrated and dried under high vacuum to give **11** (5 mg, 93%) as an amorphous solid;  $[\alpha]_{\text{D}} = +0.6$  ( $c$  0.5,  $\text{H}_2\text{O}$ ).  $^1\text{H}$  NMR ( $\text{D}_2\text{O}$ )



selected data:  $\delta$  8.00, 7.52, 7.32, and 7.20 (4 H, 4 s, triazole 4-H), 5.13, 5.11, 5.1 and 5.08 (4 H, 4 d,  $J = 1.9$  Hz, 1'-H, 1''-H, 1'''-H, 1''''-H).

**Typical procedure for microwave assisted coupling for the synthesis of compounds 3, 5, 7, 9.**

A mixture of sugar acetylene (0.1 mmol), sugar azide (0.1 mmol), *N,N*-diisopropylethylamine (0.2 mmol), CuI (5 mg, 0.026 mmol) and DMF (0.6 cm<sup>3</sup>) in a vial sealed with a Teflon septum and aluminium crimp was subjected to microwave irradiation for 5 min at 100 °C. The work-up and purification were identical to the ones used in the conventional coupling procedure.

**Typical procedure for microwave assisted alcohol-to-azide conversion for the synthesis of compounds 4, 6, 8.**

A mixture of sugar alcohol (0.1 mmol), diphenyl phosphoryl azide (0.3 mmol), 1,8-diazabicyclo[5.4.0.]undec-7-ene (0.2 mmol) and anhydrous DMF (0.6 cm<sup>3</sup>) in a vial sealed with a Teflon septum and aluminium crimp was subjected to microwave irradiation for 2 h at 120 °C. The work-up and purification were identical to the ones used in the conventional alcohol-to-azide conversion procedure.

**References**

- 19 W. L. F Armarego, D. D. Perrin, *Purification of Laboratory Chemicals*, 4th ed., Butterworth-Heinemann: Oxford, 1996.
- 20 W. C. Still, M. Kahn, A. Mitra, *J. Org. Chem.*, 1978, **43**, 2923-2925.
- 21 The compound **13** was already reported in the literature; however only its <sup>1</sup>H NMR data were described (T. Nishikawa, M. Ishikawa and M. Isobe, *Synlett*, 1999, 123-125.
